# Supplementary material
Source: ML conference proceedings conference paper supplement (https://openreview.net/forum?id=U3gobB4oKv)

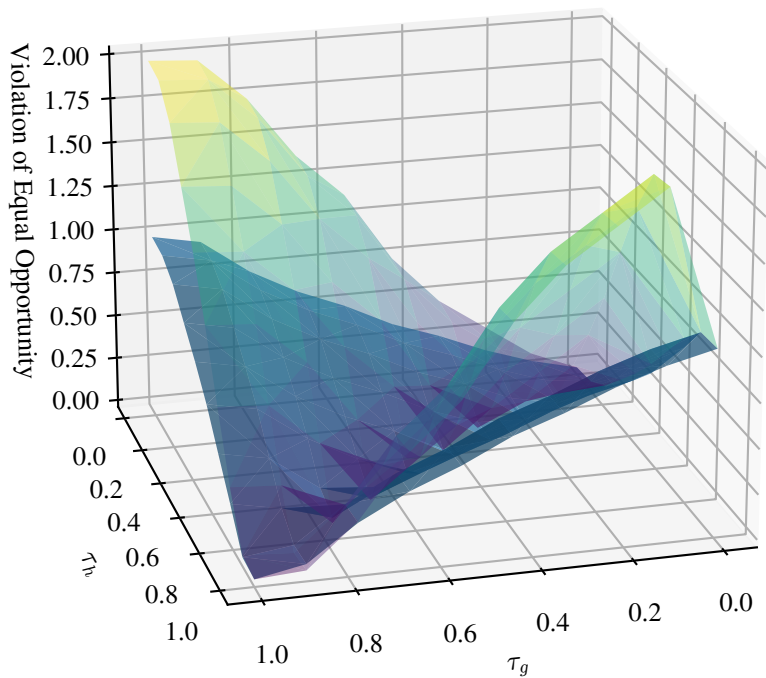

Supplement: supplementary_material [file attachment]

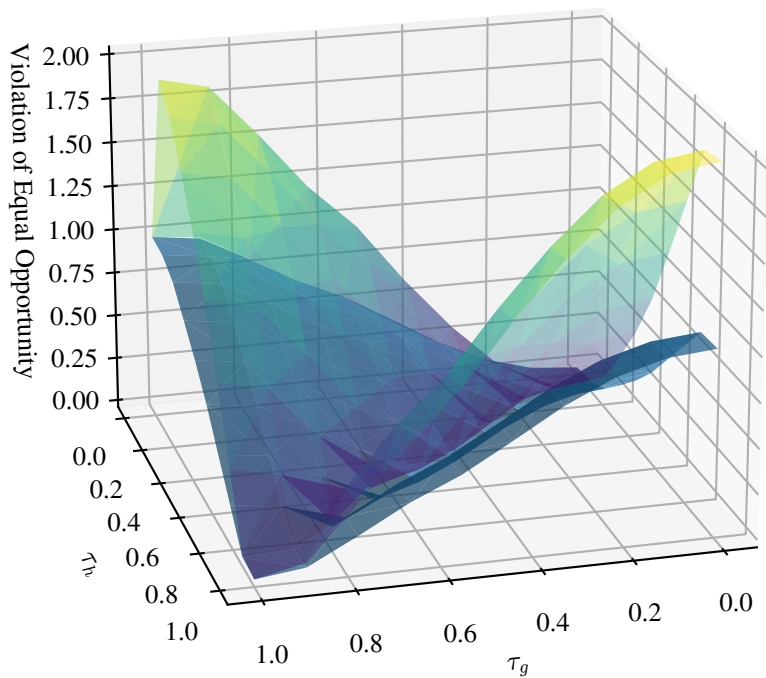

Supplement: supplementary_material [file attachment]

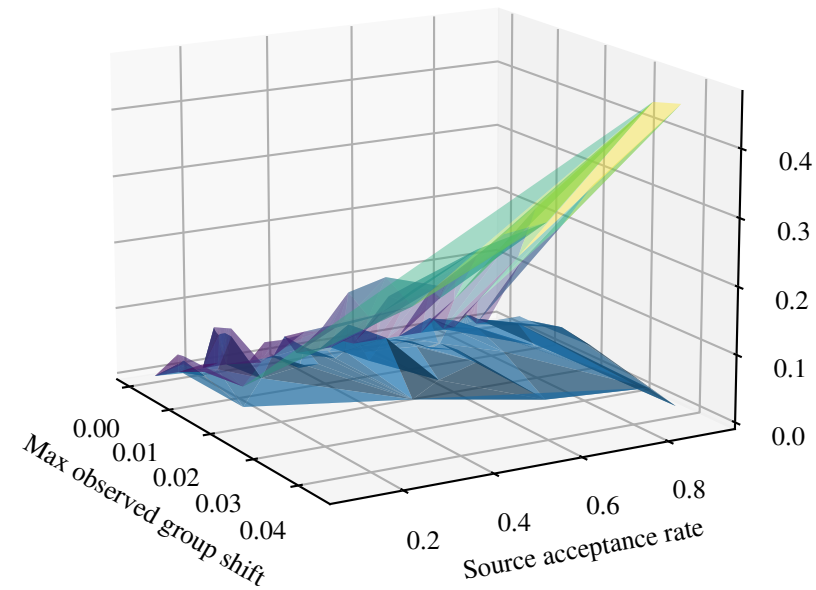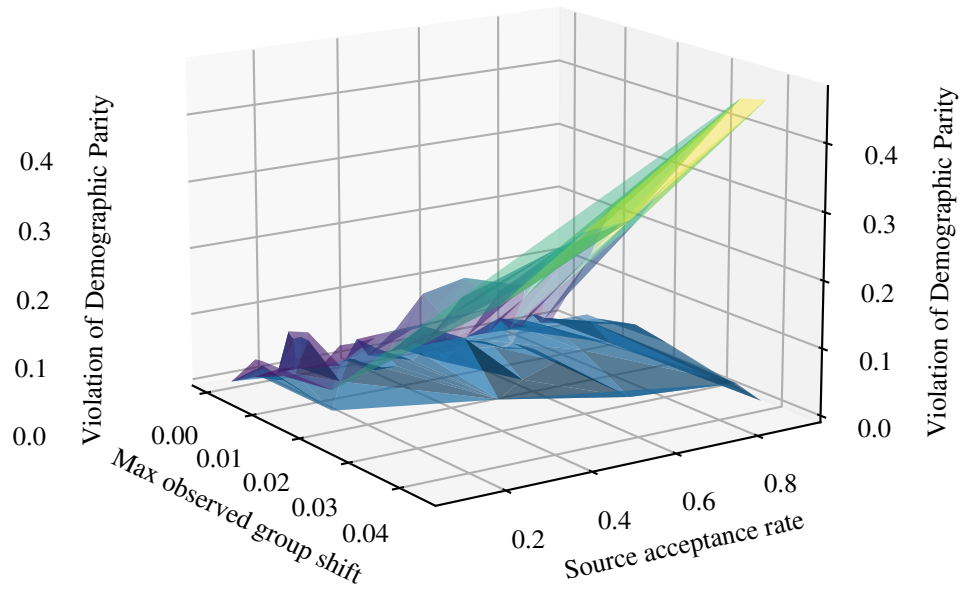

Supplement: supplementary_material [file attachment]

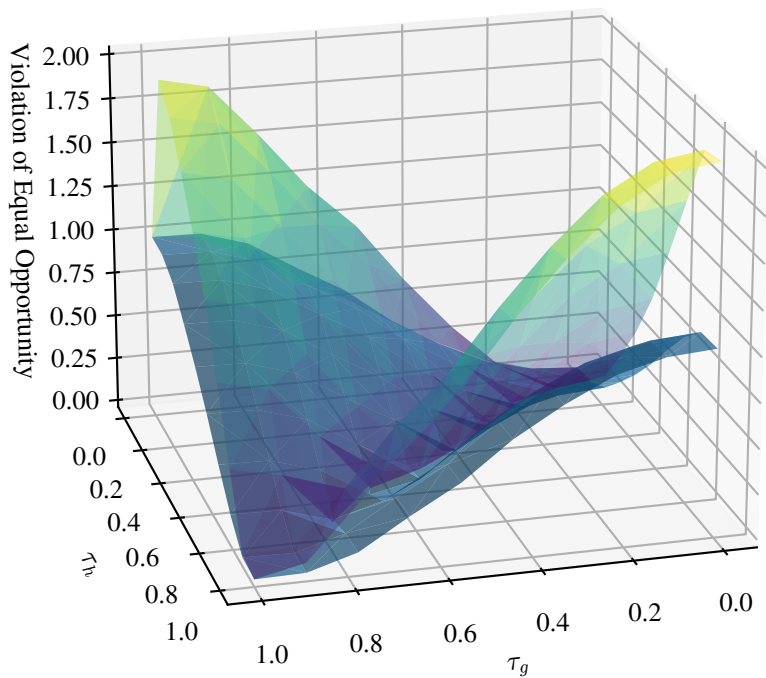

Supplement: supplementary_material [file attachment]

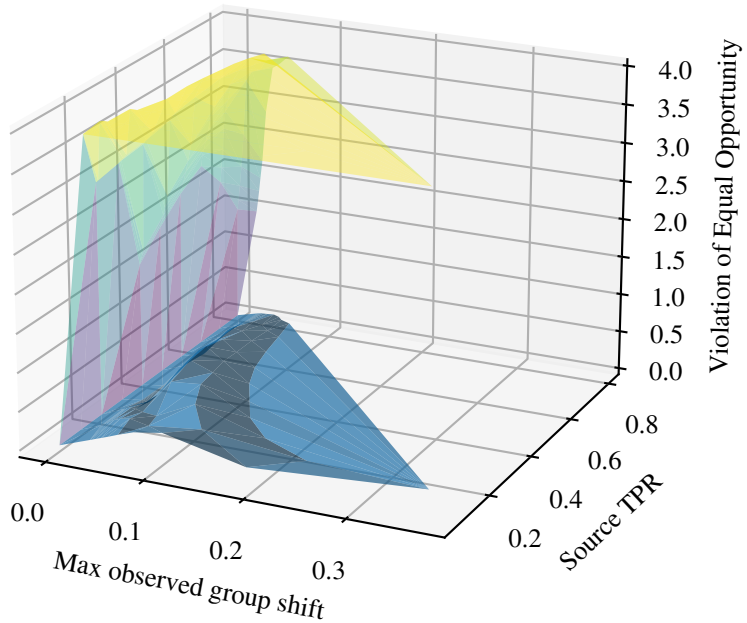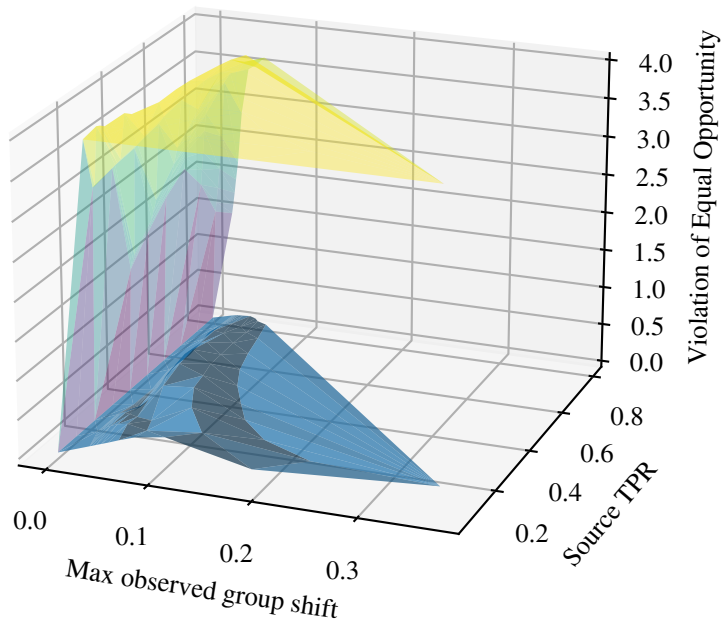

Supplement: supplementary_material [file attachment]

Modelled Shift

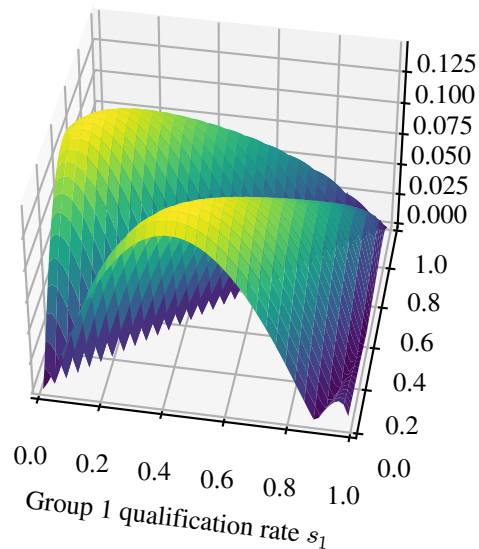

Theoretical Bound

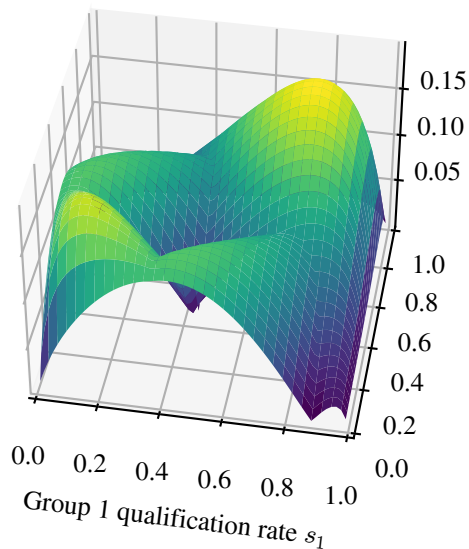

Bound - Modelled Shift

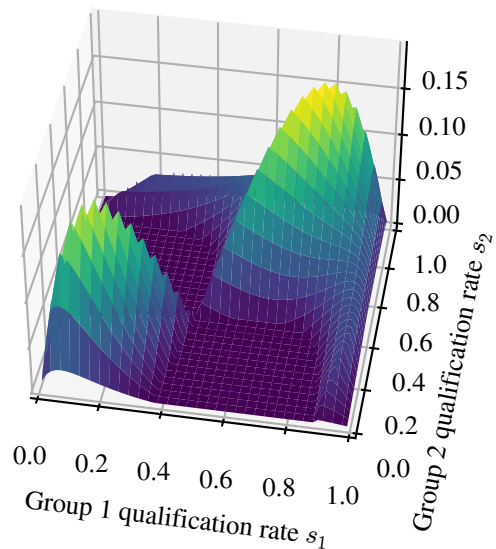

Supplement: supplementary_material [file attachment]
